# Supplementary material
Source: publisher site journal article supplement (https://www.dovepress.com/article/230171)
Supplement: Supplementary file 1 [file get_supplementary_file.php]

## Supplementary Figure 1

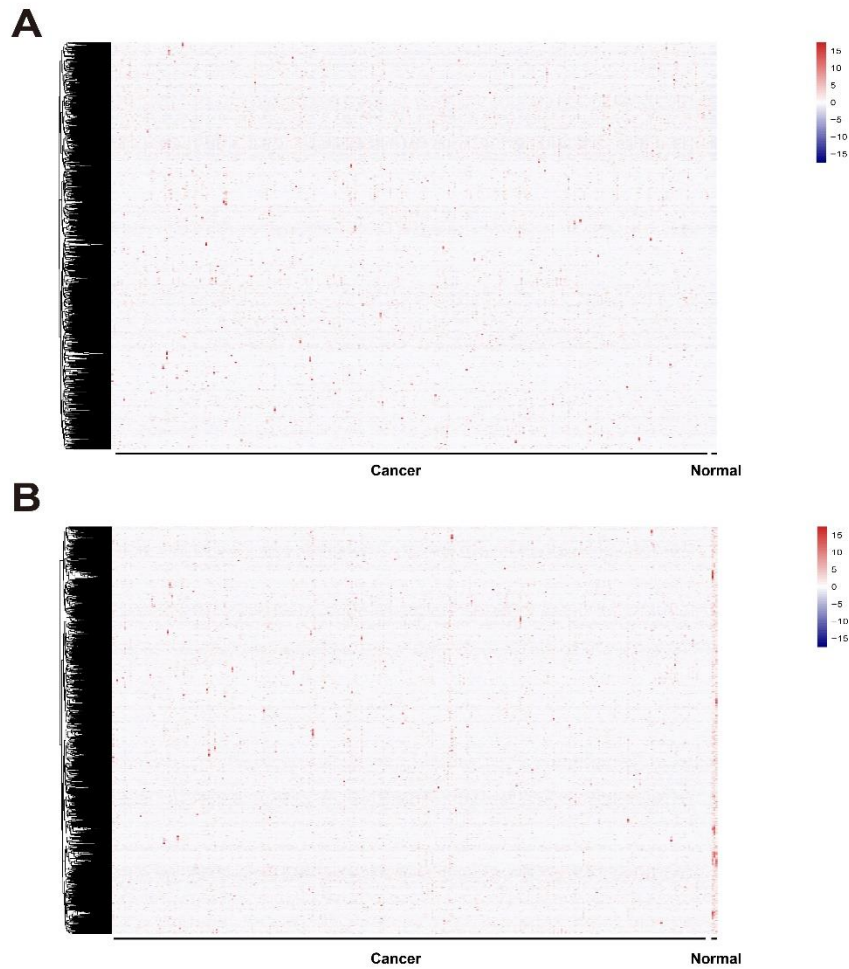

**Supplementary Figure 1. Heatmap of differentially expressed genes in cervical cancer based on TCGA.** (A, B) Heatmap illustrating the 1979 dysregulated lncRNAs including 927 upregulated lncRNAs (A) and 1052 downregulated lncRNAs (B) in cervical cancer tissues (fold change  $>1$  or fold change  $<-1$ , P-value  $<0.05$ ).

## Supplementary Figure 2

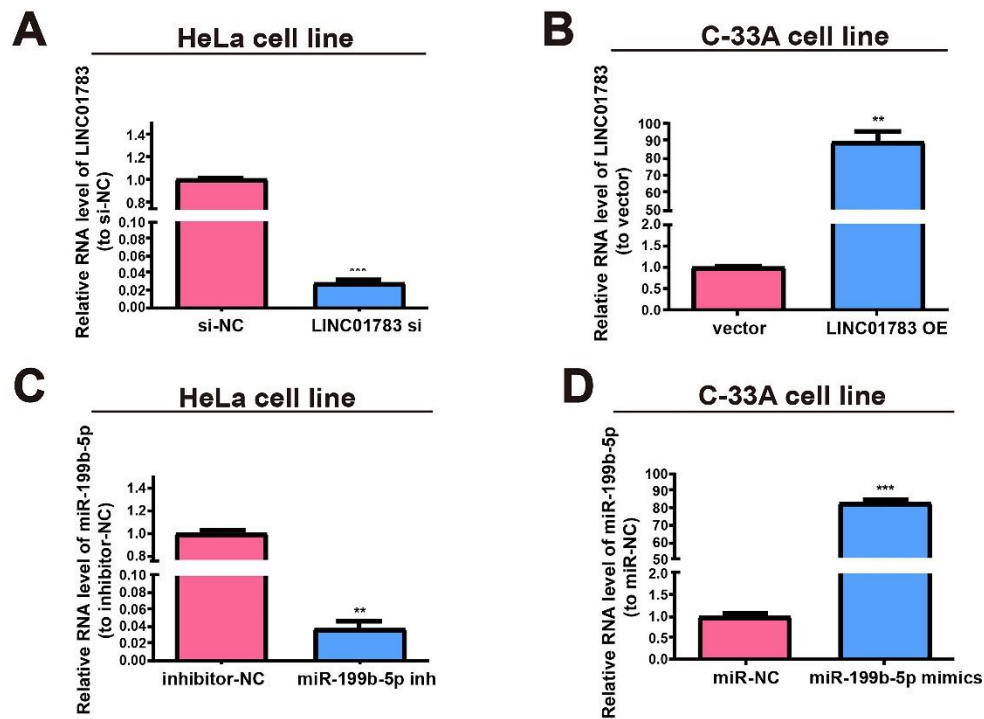

**Supplementary Figure 2. Transfection efficiency.** (A) qRT-PCR was used to identify the effect of LINC01783 siRNA in HeLa cells. (B) The RNA level of LINC01783 was detected by qRT-PCR after transfection with LINC01783 over-expressing vector. (C) qRT-PCR was used to identify the effect of miR-199b-5p inhibitor in HeLa cells. (D) The RNA level of miR-199b-5p was detected by qRT-PCR after transfection with miR-199b-5p mimics. \*\* $P < 0.01$ , \*\*\* $P < 0.001$ .
